# Supplementary material
Source: HighWire-hosted journal article supplement (https://srh.bmj.com/content/50/1/43)
Supplement: inline-supplementary-material-2 [file inline-supplementary-material-2.pdf]

**Reversal of medication abortion with progesterone: a systematic review****Supplementary File 2: tables****Supplementary Table 1. Critical appraisal of 3 case series included in a systematic review of abortion reversal**

|                                                                                                               | Delgado & Davenport (2012) | Garratt & Turner (2017) | Delgado, et al (2018) |
|---------------------------------------------------------------------------------------------------------------|----------------------------|-------------------------|-----------------------|
| Were there clear criteria for inclusion in the case series?                                                   | No                         | Yes                     | No                    |
| Was the condition measured in a standard, reliable way for all participants included in the case series?      | No                         | Yes                     | No                    |
| Were valid methods used for identification of the condition for all participants included in the case series? | No                         | Unclear                 | No                    |
| Did the case series have consecutive inclusion of participants?                                               | Unclear                    | Unclear                 | Unclear               |
| Did the case series have complete inclusion of participants?                                                  | Unclear                    | Unclear                 | Unclear               |
| Was there clear reporting of the demographics of the participants in the study?                               | No                         | No                      | No                    |
| Was there clear reporting of clinical information of the participants?                                        | No                         | Yes                     | No                    |
| Were the outcomes or follow up results of cases clearly reported?                                             | Yes                        | Yes                     | Yes                   |
| Was there clear reporting of the presenting site(s)/clinic(s) demographic information?                        | No                         | No                      | No                    |
| Was statistical analysis appropriate?                                                                         | N/A                        | N/A                     | No                    |

Supplementary Table 2. Detailed explanation for critical appraisal of case series

|                                                                                                               | Delgado & Davenport (2012)                                                                                                                                                                                     | Garratt & Turner (2017)                                                                                        | Delgado, et al (2018)                                                                                                                                                                                                                          |
|---------------------------------------------------------------------------------------------------------------|----------------------------------------------------------------------------------------------------------------------------------------------------------------------------------------------------------------|----------------------------------------------------------------------------------------------------------------|------------------------------------------------------------------------------------------------------------------------------------------------------------------------------------------------------------------------------------------------|
| Were there clear criteria for inclusion in the case series?                                                   | No – criteria for inclusion in the series are not specified                                                                                                                                                    | Yes – only criterion specified was < 48 hours from mifepristone, no misoprostol                                | No – one criterion specified (72 hours or less after mifepristone, no misoprostol); unclear why 954 women did not initiate progesterone; ultrasound was done in some but not all cases (unknown how many) prior to progesterone administration |
| Was the condition measured in a standard, reliable way for all participants included in the case series?      | No – no mention of an ultrasound protocol to assess viability of pregnancy after treatment                                                                                                                     | Yes – follow up ultrasound arranged to assess viability after treatment with progesterone                      | No – no mention on how outcome data were obtained or measured                                                                                                                                                                                  |
| Were valid methods used for identification of the condition for all participants included in the case series? | No – one patient did not have a live embryo documented prior to taking mifepristone; no mention of how other pregnancies were confirmed; no mention of how viability of pregnancy was assessed after treatment | Unclear – no mention of how pregnancies were initially confirmed, presumably at abortion clinics (ultrasound?) | No – no information on how pregnancies were initially confirmed or assessed for viability after treatment; significant variability due to >300 providers involved                                                                              |
| Did the case series have consecutive inclusion of participants?                                               | Unclear – no comment on whether inclusion of participants was consecutive                                                                                                                                      | Unclear – no comment on whether inclusion of participants was consecutive                                      | Unclear – no comment on whether inclusion of participants was consecutive                                                                                                                                                                      |
| Did the case series have complete inclusion of participants?                                                  | Unclear – no mention of whether case series includes all patients treated by the authors with progesterone                                                                                                     | Unclear – no mention of whether case series includes all patients treated by the authors with progesterone     | Unclear what happened to the 954 women who called the hotline but did not initiate progesterone – were some excluded because ultrasound was done and showed there was no live embryo?                                                          |
| Was there clear reporting of the demographics of the participants in the study?                               | No – no demographic information included                                                                                                                                                                       | No – no demographic information included                                                                       | No – no demographic information included                                                                                                                                                                                                       |
| Was there clear reporting of clinical information of the participants?                                        | No – for some participants, no information on gestational age or progesterone dose received                                                                                                                    | Yes – gestational age and progesterone dose given for all participants                                         | No – for some participants, no information on gestational age or progesterone dose received                                                                                                                                                    |
| Were the outcomes or follow up results of cases clearly reported?                                             | Yes – information available for primary outcome (ongoing pregnancy), except for participants lost to follow-up (1)                                                                                             | Yes – information available for primary outcome (ongoing pregnancy)                                            | Yes – information available for primary outcome (ongoing pregnancy), except for participants lost to follow-up (112)                                                                                                                           |
| Was there clear reporting of the presenting site(s)/clinic(s) demographic information?                        | No – no description of clinical sites                                                                                                                                                                          | No – no description of clinical sites                                                                          | No – no description of clinical sites                                                                                                                                                                                                          |
| Was statistical analysis appropriate?                                                                         | N/A                                                                                                                                                                                                            | N/A                                                                                                            | No – inappropriate statistical analysis comparing various regimens and gestational ages with a single data point from another study (25% “embryo survival rate” after mifepristone, based on a study in which all participants were < 7 weeks) |

**Supplementary Table 3. Critical appraisal of a randomized controlled trial included in a systematic review of abortion reversal**

|                                                                                                                                                                                       | Creinin et al (2020) |
|---------------------------------------------------------------------------------------------------------------------------------------------------------------------------------------|----------------------|
| Was true randomization used for assignment of participants to treatment groups?                                                                                                       | Yes                  |
| Was allocation to treatment groups concealed?                                                                                                                                         | Yes                  |
| Were treatment groups similar at the baseline?                                                                                                                                        | Yes                  |
| Were participants blind to treatment assignment?                                                                                                                                      | Yes                  |
| Were those delivering treatment blind to treatment assignment?                                                                                                                        | Yes                  |
| Were outcomes assessors blind to treatment assignment?                                                                                                                                | Unclear              |
| Were treatment groups treated identically other than the intervention of interest?                                                                                                    | Yes                  |
| Was follow up complete and if not, were differences between groups in terms of their follow up adequately described and analyzed?                                                     | Yes                  |
| Were participants analyzed in the groups to which they were randomized?                                                                                                               | Yes                  |
| Were outcomes measured in the same way for treatment groups?                                                                                                                          | Yes                  |
| Were outcomes measured in a reliable way?                                                                                                                                             | Yes                  |
| Was appropriate statistical analysis used?                                                                                                                                            | Yes                  |
| Was the trial design appropriate, and any deviations from the standard RCT design (individual randomization, parallel groups) accounted for in the conduct and analysis of the trial? | Yes                  |
